# Supplementary material for: A PCBM-assisted perovskite growth process to fabricate high efficiency semitransparent solar cells
Source: Royal Society of Chemistry journal article supplement (doi:10.1039/c6ta04790d), 2016-01-01
Supplement: c6ta04790d1.pdf [file c6ta04790d1.pdf]

### Supplementary Information

## A PCBM-assisted low temperature process to fabricate high efficiency semitransparent perovskite solar cells

Chao Li,<sup>a,b</sup> Joseph Sleppy,<sup>b</sup> Nitesh Dhasmana,<sup>c</sup> Mikhael Soliman,<sup>a,b</sup> Laurene Tetard<sup>d</sup> and Jayan Thomas<sup>a,b,c,\*</sup>

<sup>a</sup>Department of Materials Science and Engineering, University of Central Florida, Orlando, FL, 32816, USA.

<sup>b</sup>NanoScience Technology Center, University of Central Florida, Orlando, FL, 32826.

<sup>c</sup>CREOL, College of Optics and Photonics, University of Central Florida, Orlando, FL, 32816.

<sup>d</sup>Department of Physics, University of Central Florida, Orlando, FL, 32816.

\*Correspondence and requests for materials should be addressed to J.T. (email:

Jayan.Thomas@ucf.edu).

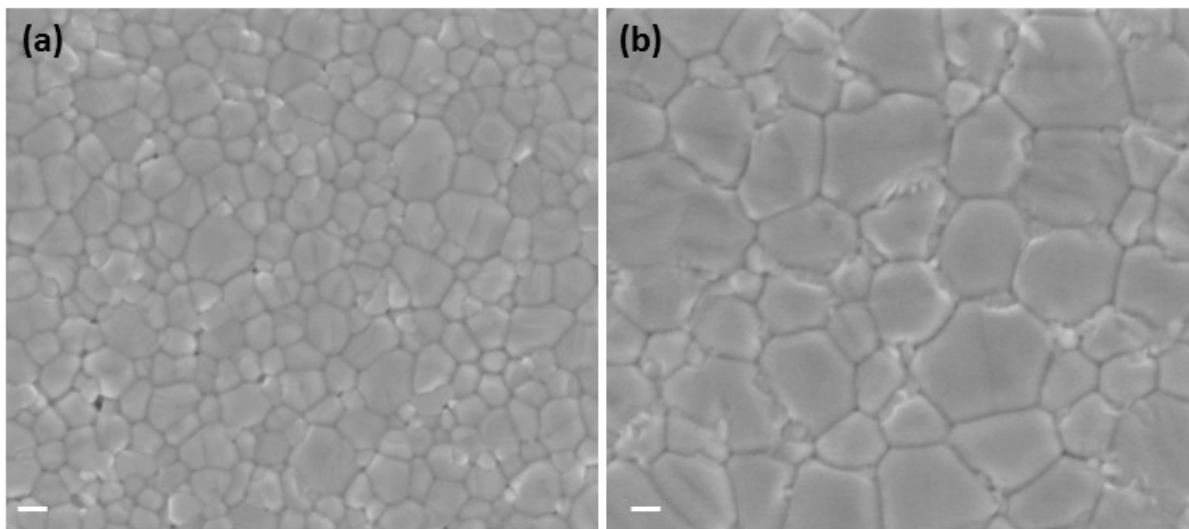

**Fig. S1** SEM images of the surface morphology of the  $\text{CH}_3\text{NH}_3\text{PbI}_3$  films prepared by (a) conventional growth method and (b) CB assisted growth method. Scale bar: 200nm.

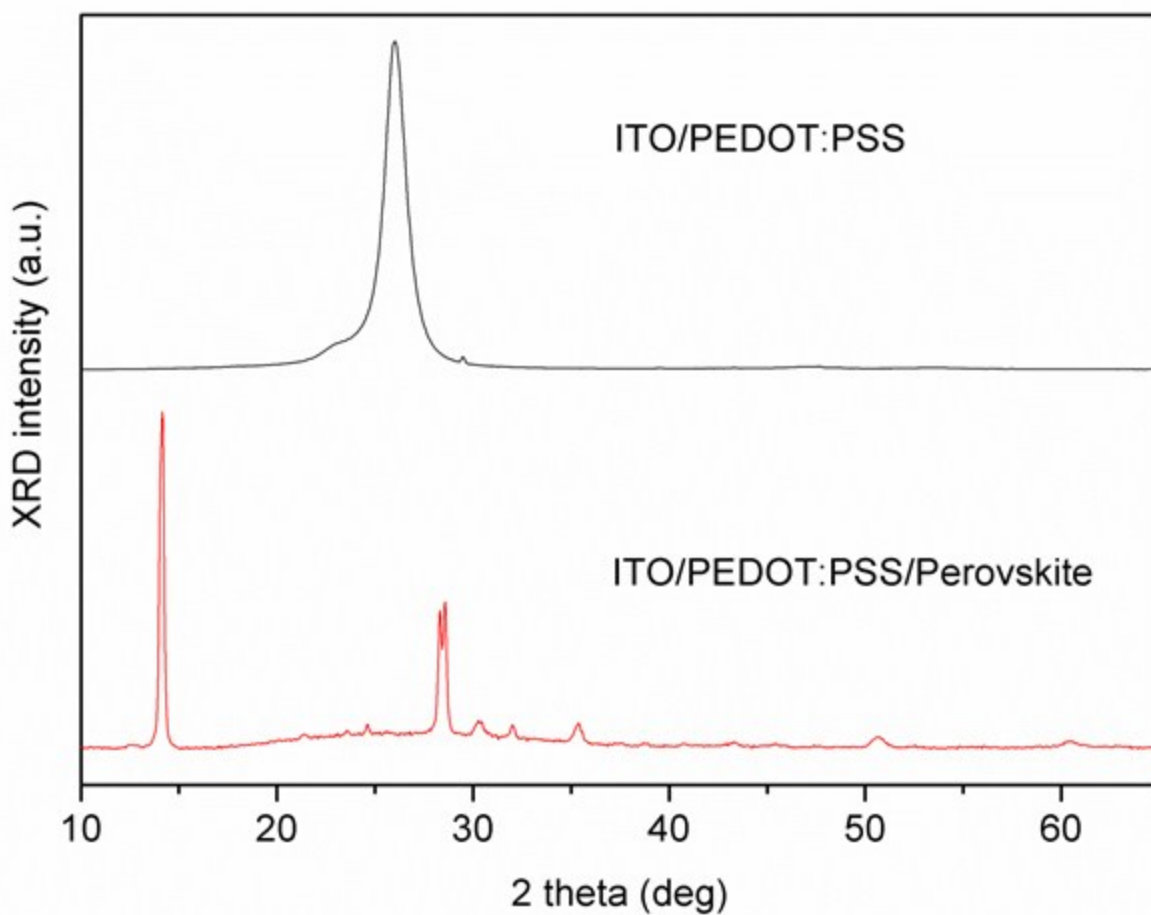

**Fig. S2** XRD pattern of the perovskite crystals grown on PEDOT:PSS/ITO (red line), with blank sample of the PEDOT:PSS coated ITO substrate for comparison (black line).

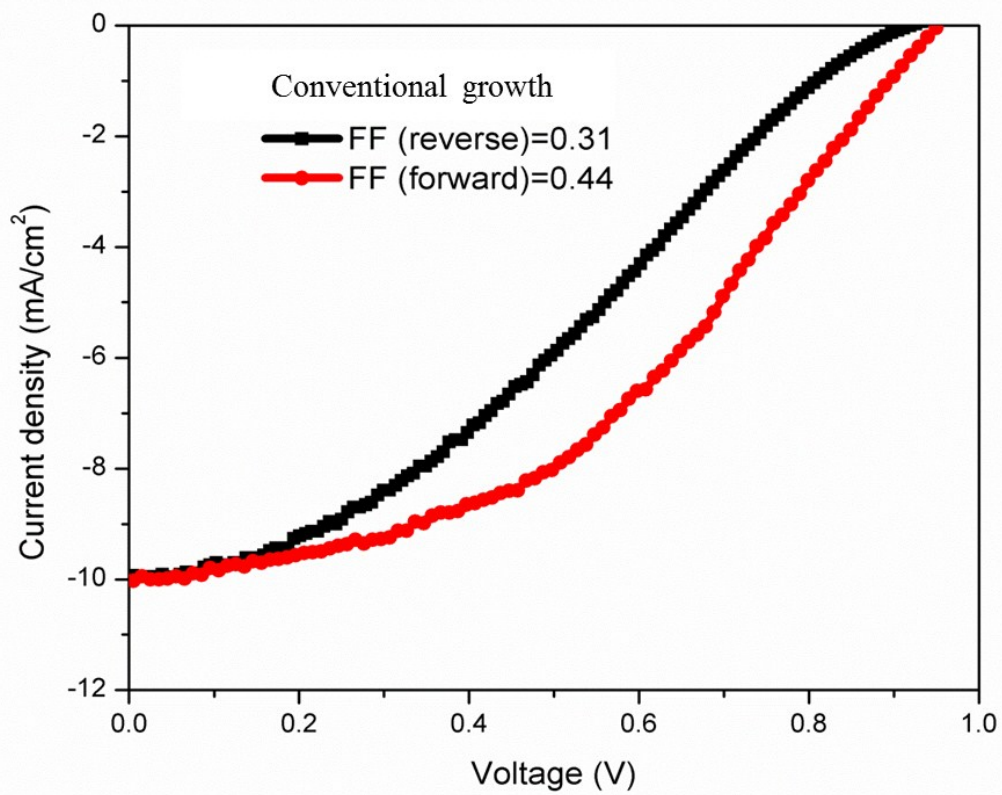

**Fig. S3** J-V curve of conventional growth device with large hysteresis.

**Table S1** Summary of opaque PSC performances with 100nm thick Au electrode.

| Cell                 | $V_{oc}$<br>(V) | $J_{sc}$<br>(mA cm <sup>-2</sup> ) | FF<br>(%) | PCE<br>(%) |
|----------------------|-----------------|------------------------------------|-----------|------------|
| Conventional growth  | 0.930           | 14.98                              | 55.14     | 7.68       |
| CB-assisted growth   | 0.958           | 16.46                              | 61.86     | 9.75       |
| PCBM-assisted growth | 1.017           | 17.82                              | 70.12     | 12.71      |

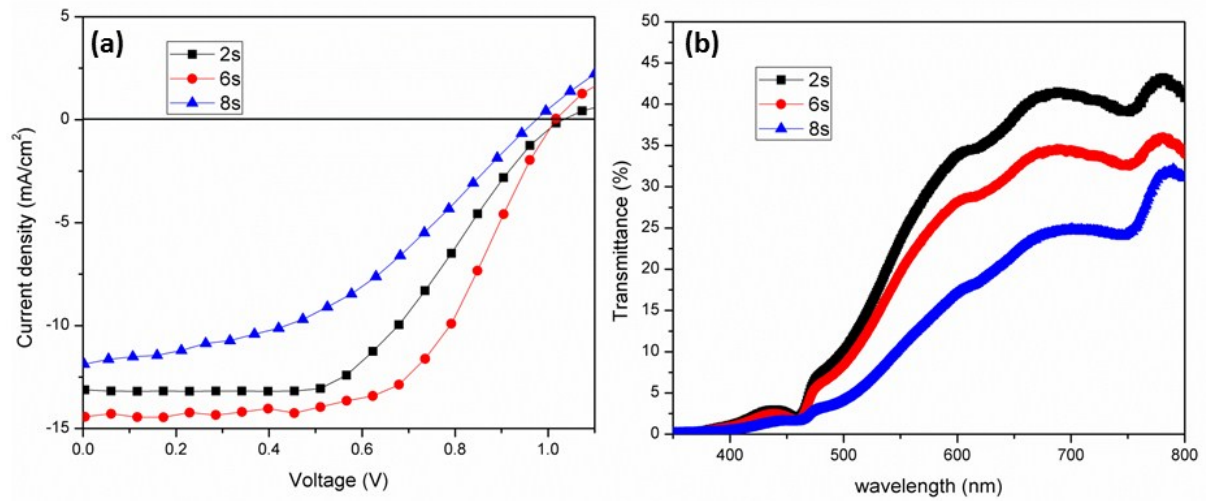

**Fig. S4** (a) Current-Voltage characteristics and (b) Transmittance spectra of complete perovskite solar cells prepared by adding PCBM solution at different delay times (2s, 6s, 8s) from the start of the spin-coating process.

**Table S2** Device parameters for solar cells using perovskite films prepared by adding PCBM solution at different delay times (2s, 6s, 8s) from the start of the spin-coating process.

| Cell            | $V_{oc}$<br>(V) | $J_{sc}$<br>(mA cm <sup>-2</sup> ) | FF<br>(%) | PCE<br>(%) |
|-----------------|-----------------|------------------------------------|-----------|------------|
| PCBM drop at 2s | 1.031           | 12.82                              | 53.94     | 7.13       |
| PCBM drop at 6s | 1.017           | 14.33                              | 60.44     | 8.81       |
| PCBM drop at 8s | 0.976           | 11.87                              | 42.64     | 5.0        |

In order to demonstrate the benefits of high  $V_{oc}$  perovskite solar cells, we connected two devices in series to efficiently power a red-light emitting diode (LED; operating voltage-1.7V). Figure S5 shows the lighting of LED, before (5a) and after (5b) connecting the perovskite solar cell. This is to demonstrate that high  $V_{oc}$  PSCs require fewer devices compared with low  $V_{oc}$  solar cells<sup>1</sup> to illuminate LED.

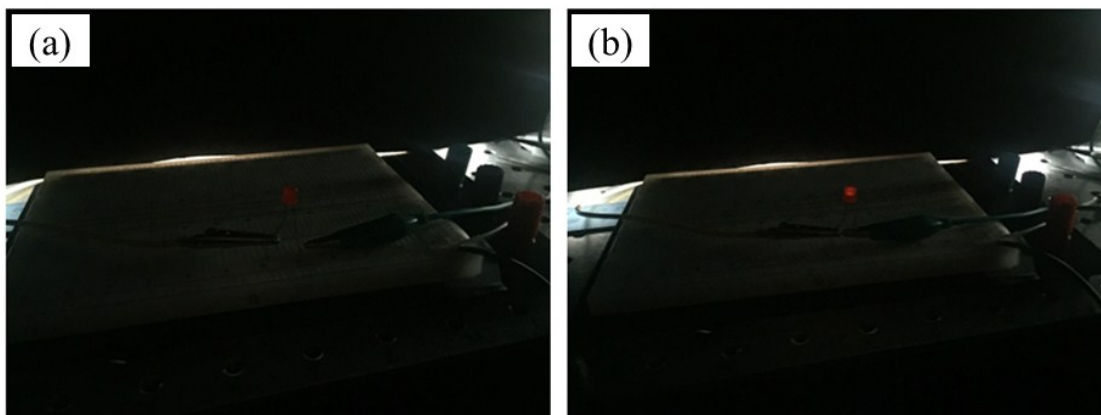

**Fig. S5** It shows the red LED light before (5a) and after (5b) connecting the perovskite solar cell.



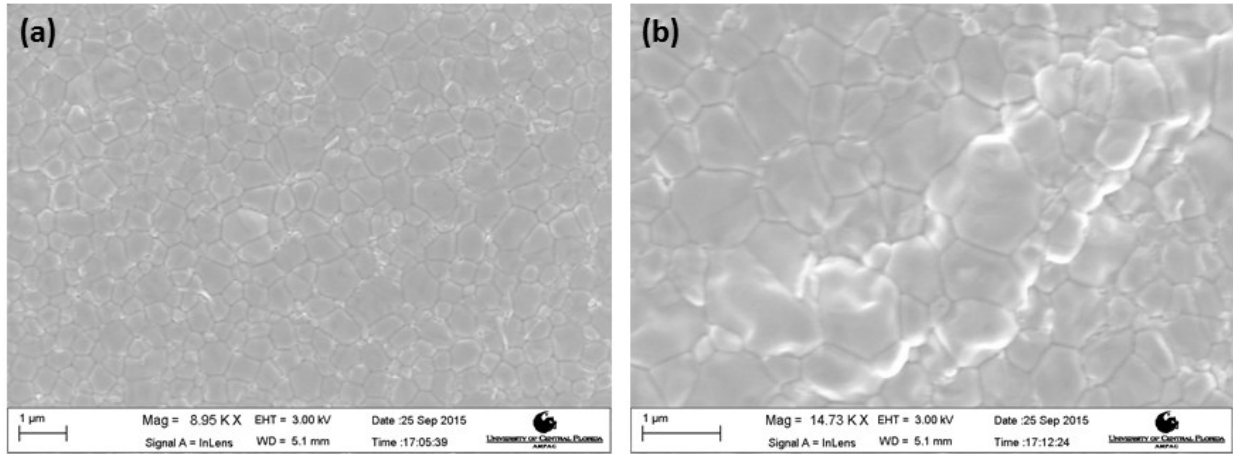

**Fig. S6** SEM images of the surface morphology of the  $\text{CH}_3\text{NH}_3\text{PbI}_3$  films prepared by PCBM solution at different delay times from the start of the spin-coating process: (a) 6s; (b) 8s.

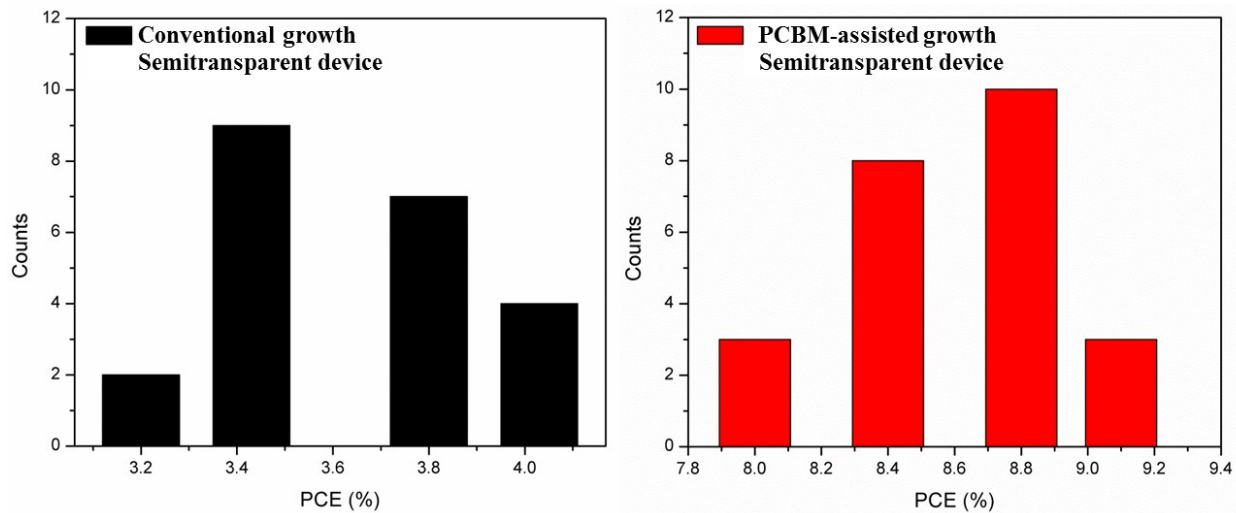

**Fig. S7** Deviation of average power conversion efficiency of more than 20 conventional growth and PCBM assisted growth semitransparent devices

**Reference:**

- 1 S. Pan, Z. Yang, P. Chen, J. Deng, H. Li and H. Peng, *Angewandte Chemie International Edition*, 2014, **53**, 6110-6114.
